# Supplementary material for: Immuno-PET Imaging of the Programmed Cell Death-1 Ligand (PD-L1) Using a Zirconium-89 Labeled Therapeutic Antibody, Avelumab
Source: PubMed Central journal article supplement (PMC6498777; doi:10.1177/1536012119829986), 2019-05-02
Supplement: PDL1_supportingInfo_ejagoda_(1).pdf [file PDL1_supportingInfo_ejagoda_%281%29.pdf]

## **Supporting Information**

### **Immuno-PET Imaging of the Programmed Cell Death-1 Ligand (PD-L1) Using a Zirconium-89 Labeled Therapeutic -Antibody, Avelumab**

Elaine M. Jagoda<sup>1</sup>, Olga Vasalatiy<sup>2</sup>, Falguni Basuli<sup>2</sup>, Ana Christina L. Opina<sup>2</sup>, Mark R. Williams<sup>1</sup>, Karen Wong<sup>1</sup>, Kelly C. Lane<sup>2</sup>, Steve Adler<sup>1</sup>, Anita Thein Ton<sup>1</sup>, Lawrence P. Szajek<sup>3</sup>, Biying Xu<sup>2</sup>, Rolf E. Swenson<sup>2</sup>, John Greiner<sup>4</sup>, James Gulley<sup>5</sup>, Janet Eary<sup>6</sup> and Peter L. Choyke<sup>1</sup>

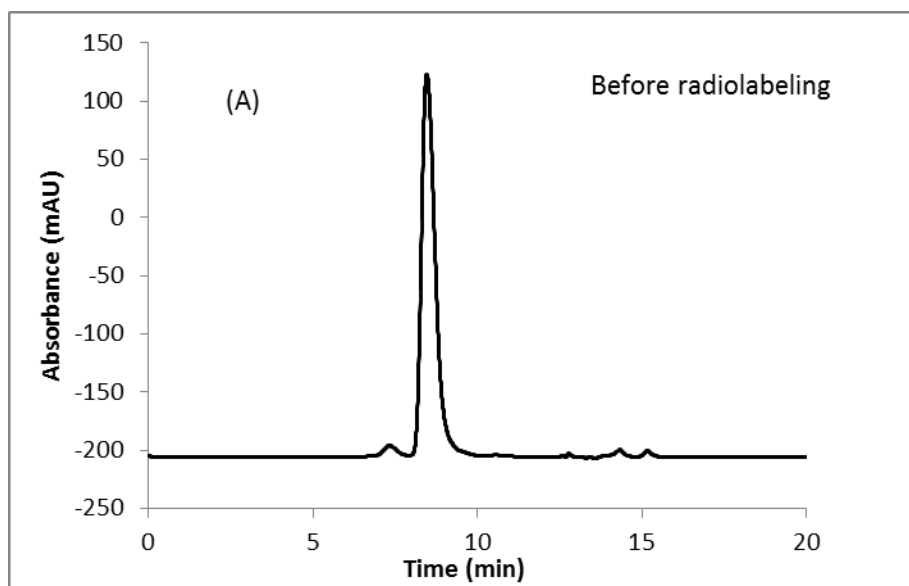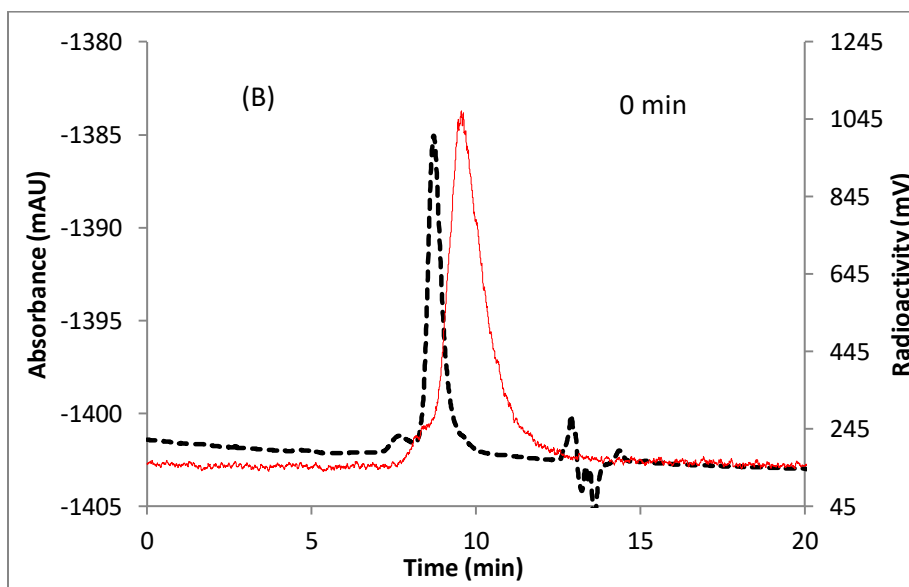

**Figure S1** : HPLC chromatogram of (A) DFO-PD-L1 mAb, before radiolabeling; (B) [ $^{89}\text{Zr}$ ]Zr-DFO-PD-L1 mAb. HPLC condition: eluent, 0.1 M sodium phosphate, 0.1 M sodium sulfate, 0.05% sodium azide, 10% *iso*-propyl alcohol (pH 6.8), flow rate 0.3 mL/min; black line UV detector, red line radiodetector.

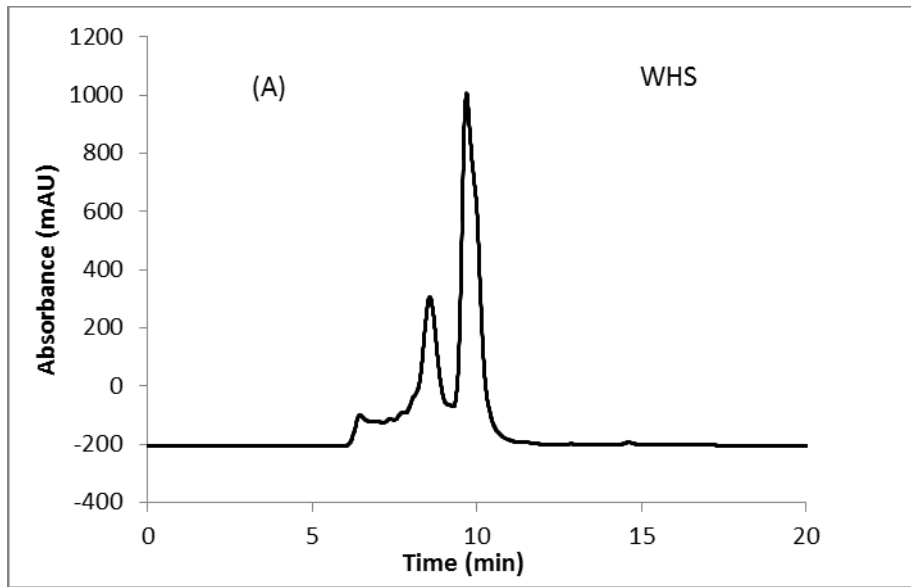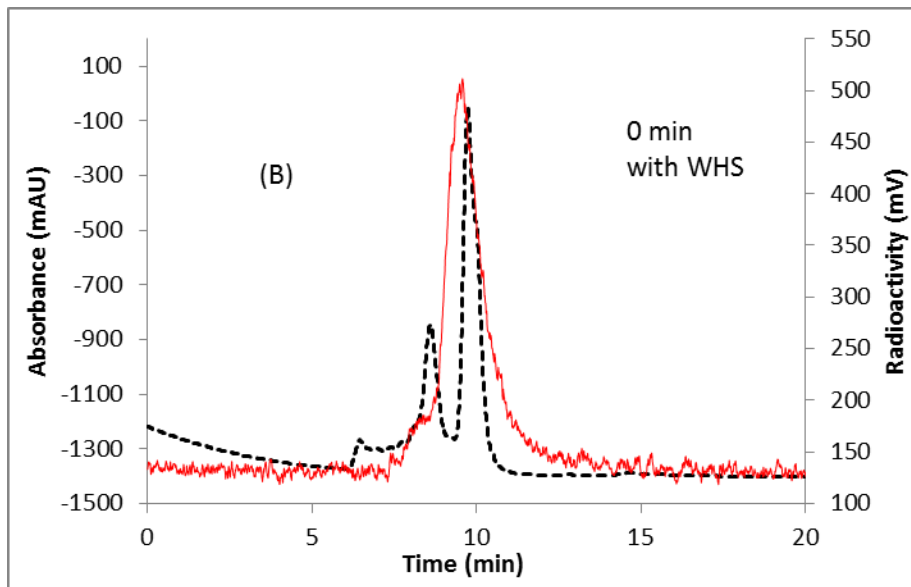

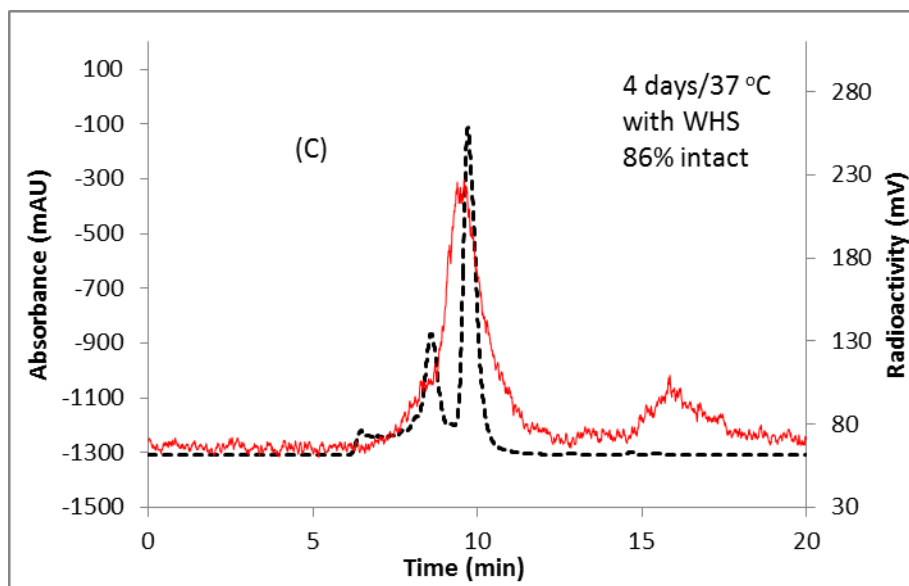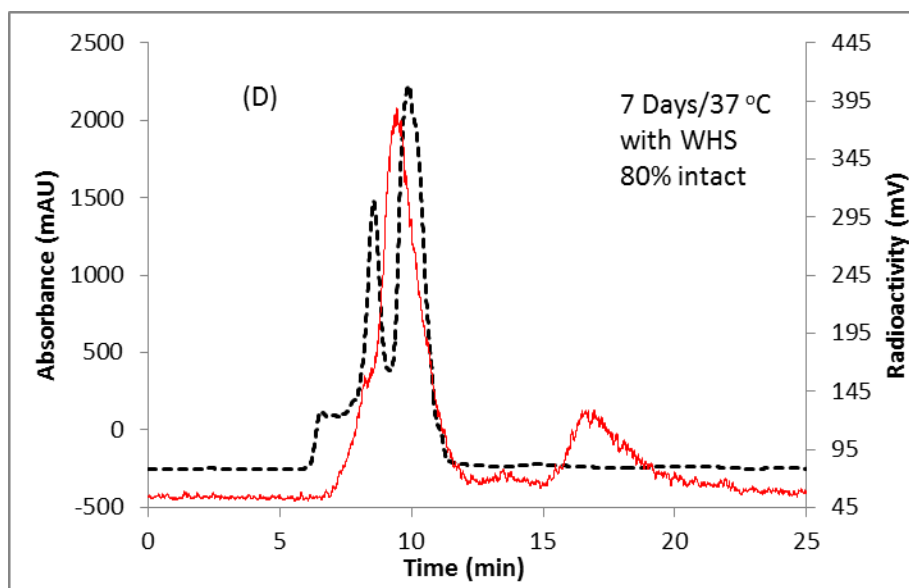

**Figure S2:** HPLC chromatogram of (A) whole human serum; (B) [ $^{89}\text{Zr}$ ]Zr-DFO-PD-L1 mAb, 0 min; (C) [ $^{89}\text{Zr}$ ]Zr-DFO-PD-L1 mAb, 4 days at 37 °C; (D) [ $^{89}\text{Zr}$ ]Zr-DFO-PD-L1 mAb, 7 days at 37 °C. HPLC condition: eluent, 0.1 M sodium phosphate, 0.1 M sodium sulfate, 0.05% sodium azide, 10% *iso*-propyl alcohol (pH 6.8), flow rate 0.3 mL/min; black line UV detector, red line radiodetector.

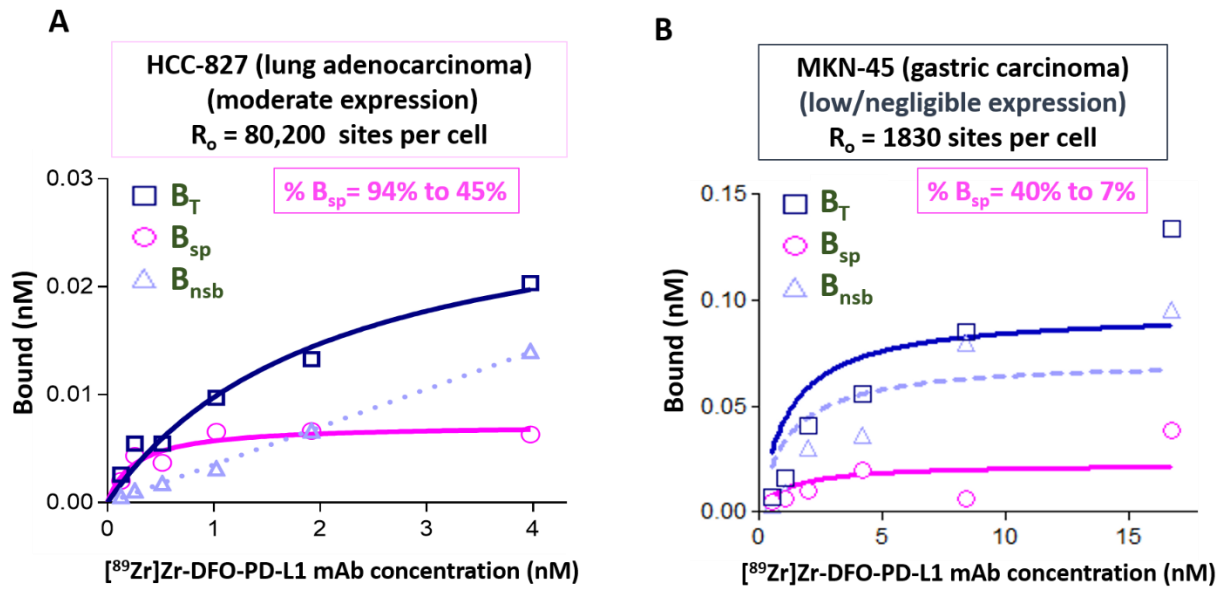

**Figure S3:** **A)** Representative in vitro  $[^{89}\text{Zr}]\text{Zr-DFO-PD-L1}$  mAb saturation binding assay using HCC- 827 cells with each point representing the average of duplicates; **B)** Representative in vitro  $[^{89}\text{Zr}]\text{Zr-DFO-PD-L1}$  mAb saturation binding assay using HCC- 827 cells with each point representing the average of duplicates;  $B_T = B_{\text{Total}}$ ;  $B_{sp} = B_{\text{specific}}$ ;  $B_{nsb} = B_{\text{non-specific}}$  (determined in the presence of  $10^{-6}$  M avelumab)
